# Supplementary material for: Interfacial effects on lithium-ion diffusion in two-dimensional lateral black phosphorus–graphene heterostructures
Source: Royal Society of Chemistry journal article supplement (doi:10.1039/d2cp05255e), 2023-01-01
Supplement: d2cp05255e1.pdf [file d2cp05255e1.pdf]

*Supplementary Materials for*

**Interfacial Effects on Lithium-ion Diffusion in Two-dimensional Lateral  
Black Phosphorus–Graphene Heterostructures**

Liyuan Cheng,<sup>a,b</sup> Mei Ge,<sup>a,b</sup> Jiali Chen<sup>a,b</sup> and Junfeng Zhang<sup>a,b\*</sup>

<sup>a</sup> Key Laboratory of Spectral Measurement and Analysis of Shanxi Province,  
Shanxi Normal University, Taiyuan 030031, China.

<sup>b</sup> School of Physics and Information Engineering, Shanxi Normal University,  
Taiyuan 030031, China. E-mail: [zhangjf@sxnu.edu.cn](mailto:zhangjf@sxnu.edu.cn)

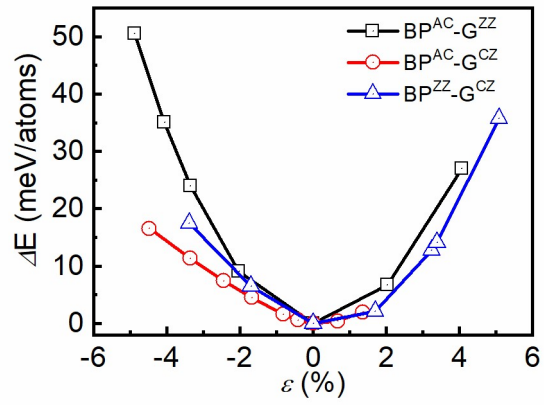

Figure S1. Total Energy differences ( $\Delta E$ ) with compress or tensile strain ( $\epsilon$ ) in the  $y$  direction for  $BP^{AC}-G^{ZZ}$ ,  $BP^{AC}-G^{CZ}$  and  $BP^{ZZ}-G^{CZ}$  heterostructures.

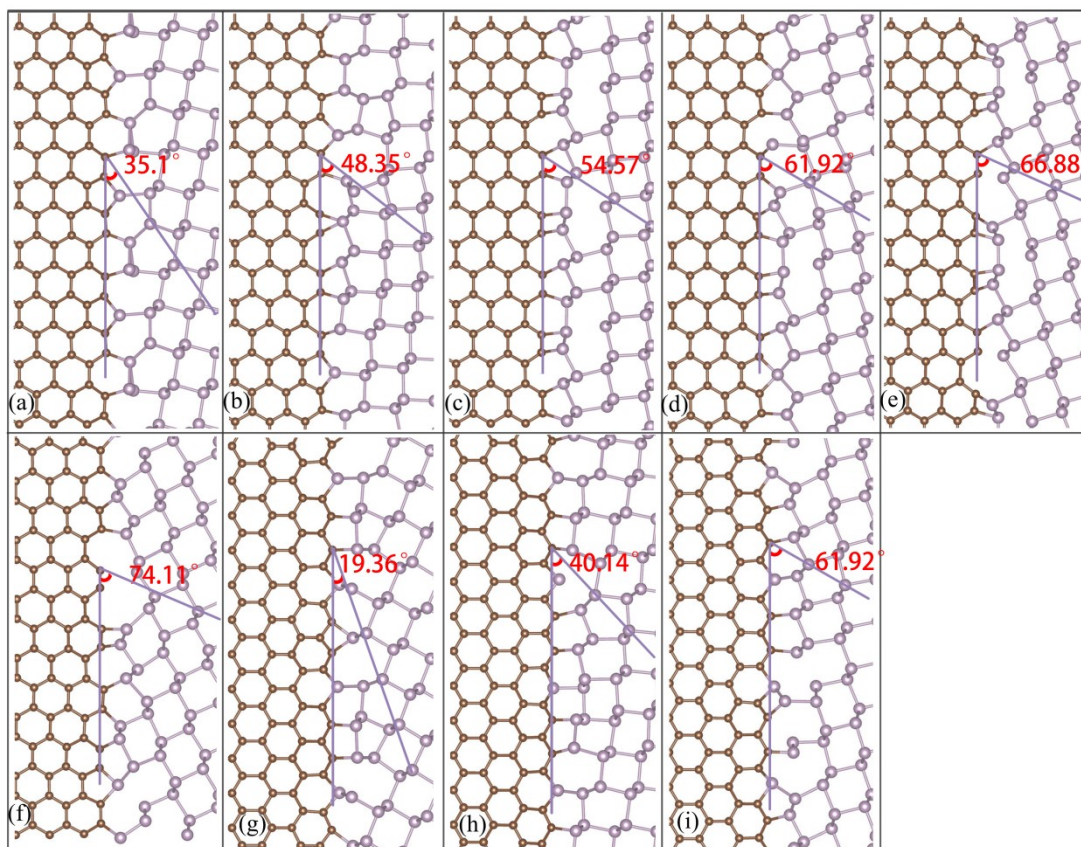

Figure S2. Atomic interfacial structures obtained for all the other stable BP<sup>R</sup>-G heterostructures with AC (a-f) and ZZ (g-i) edge of graphene domain. Rotation angles of the BP domains are labelled in red.

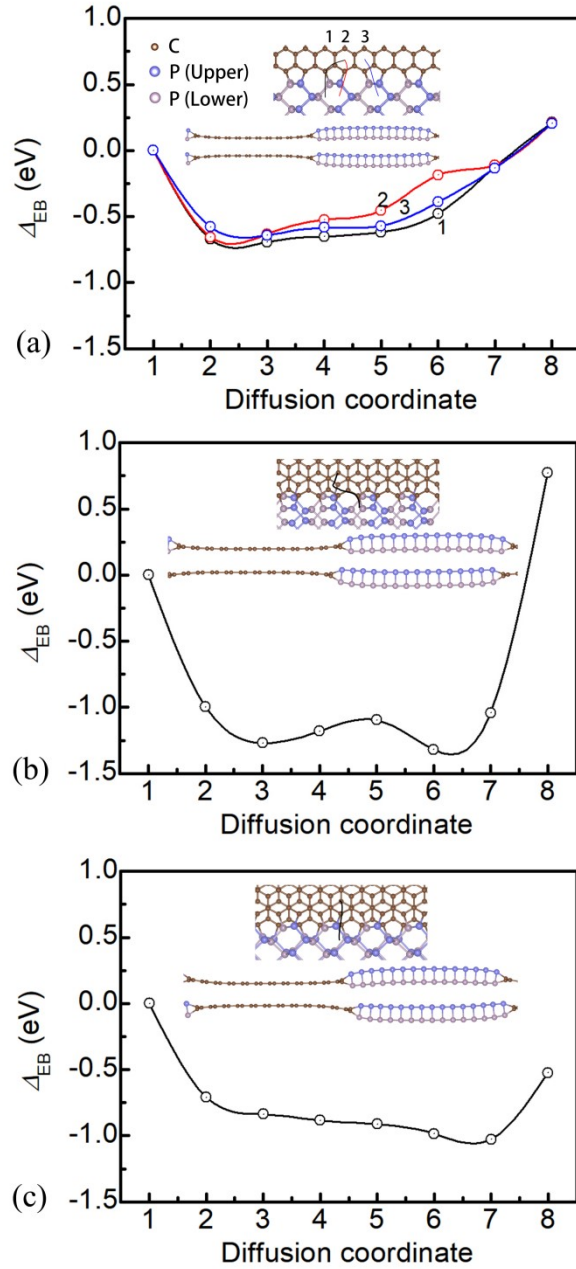

Figure S3. Li-ion diffusion paths and the corresponding  $\Delta_{EB}$  values obtained for (a) AA-stacking, (b) AB-stacking and (c) shifted AB-stacking crystal structure of BPAC-GZZ.
